# Supplementary material for: Spectrophotometric determination of peroxymonosulfate anions via oxidative decolorization of dyes induced by cobalt
Source: Royal Society of Chemistry journal article supplement (doi:10.1039/c5ay02886h), 2015-12-23

## Supplementary Material

### Spectrophotometric determination of peroxymonosulfate anion via oxidative decolorization of dyes induced by cobalt

J. Q. Zhang,<sup>a</sup> J. Ma,<sup>a,b\*</sup> J. Zou,<sup>a</sup> H.Z. Chi,<sup>a</sup> and Y. Song<sup>a</sup>

<sup>a</sup>State Key Laboratory of Urban Water Resource and Environment, Harbin Institute of Technology,  
Harbin 150090, P.R. China

<sup>b</sup>National Engineering Research Center of Urban Water Resources, Harbin Institute of Technology,  
Harbin 150090, P.R. China

Corresponding author: \*

Email address: majun@hit.edu.cn

Tel: (+86)–0451–8628–2292

Fax: (+86)–0451–8628–3010

**Seven supplemental pages, including abbreviations in main text, one table and three figures:**

Tab. SM-1. Physicochemical properties of AO7, MB, MV and RhB.

Fig. SM-1. The chemical structures of the four dyes (AO7, MB, MV and RhB).

Fig. SM-2. The degradation of 4-CP in Co(II)/PMS system. Conditions:  $[\text{Co}^{2+}] = 40 \mu\text{M}$ ,  $[\text{PMS}] = 1 \text{ mM}$ ,  $[4\text{-CP}] = 40 \mu\text{M}$ .

Fig. SM-3. Variations of PMS concentration for the degradation of 4-CP in Co(II)/PMS system with the iodometric method and the MB-based spectrophotometric method. Conditions:  $[\text{Co}^{2+}] = 40 \mu\text{M}$ ,  $[\text{PMS}] = 1 \text{ mM}$ ,  $[4\text{-CP}] = 40 \mu\text{M}$ .

**Abbreviations:**

AO7 —Acid orange 7;

MB —Methylene blue;

MV —Methyl violet;

RhB —Rhodamine B;

4-CP —4-chlorophenol;

PMS —Peroxymonosulfate (Oxone®,  $\text{KHSO}_5 \cdot 0.5\text{KHSO}_4 \cdot 0.5\text{K}_2\text{SO}_4$ ).

**Tab. SM-1 Physicochemical properties of AO7, MB, MV and RhB.**

| Name | Formula                                                    | Molecular weight | $\lambda_{\text{max}}$ | Molar absorption coefficient                |
|------|------------------------------------------------------------|------------------|------------------------|---------------------------------------------|
| AO7  | $\text{C}_{16}\text{H}_{11}\text{N}_2\text{NaO}_4\text{S}$ | 350.32           | 485 nm                 | $18500 \text{ mol}^{-1} \text{ L cm}^{-1}$  |
| MB   | $\text{C}_{16}\text{H}_{18}\text{N}_3\text{SCl}$           | 319.85           | 663 nm                 | $73500 \text{ mol}^{-1} \text{ L cm}^{-1}$  |
| MV   | $\text{C}_{24}\text{H}_{28}\text{N}_3\text{Cl}$            | 393.96           | 590 nm                 | $32100 \text{ mol}^{-1} \text{ L cm}^{-1}$  |
| RhB  | $\text{C}_{28}\text{H}_{31}\text{ClN}_2\text{O}_3$         | 479.02           | 556 nm                 | $106000 \text{ mol}^{-1} \text{ L cm}^{-1}$ |

**Fig. SM-1. The chemical structures of the four dyes (AO7, MB, MV and RhB).**

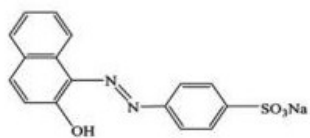

Acid orange 7 (AO7)

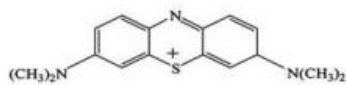

Methylene blue (MB)

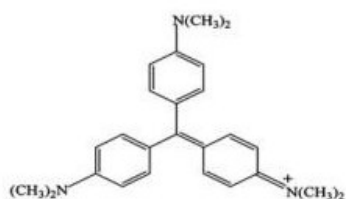

Methyl violet (MV)

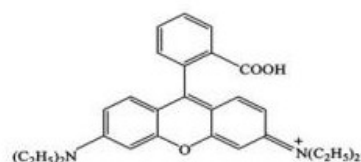

Rhodamine B (RhB)

**Fig. SM-2. The degradation of 4-CP in Co(II)/PMS system. Conditions:  $[Co^{2+}] = 40 \mu M$ ,  $[PMS] = 1 \text{ mM}$ ,  $[4-CP] = 40 \mu M$ .**

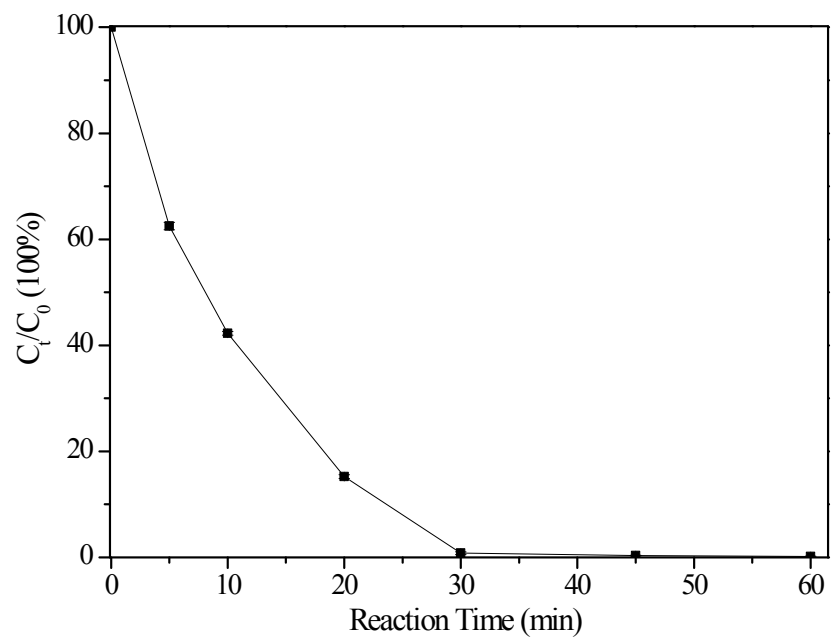

**Fig. SM-3. Variations of PMS concentration for the degradation of 4-CP in Co(II)/PMS system with the iodometric method and the MB-based spectrophotometric method. Conditions:  $[Co^{2+}] = 40 \mu M$ ,  $[PMS] = 1 mM$ ,  $[4-CP] = 40 \mu M$ .**

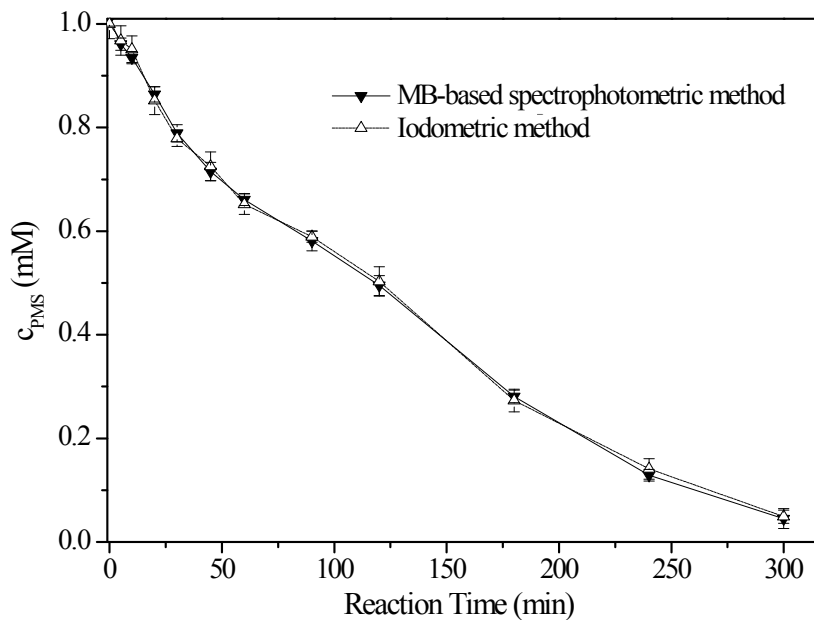

Supplement: c5ay02886h1.pdf [file c5ay02886h1.pdf]
